# Supplementary material
Source: PubMed Central journal article supplement (PMC2678470)
Supplement: 0900523106_Appendix_PDF.pdf [file 0900523106_Appendix_PDF.pdf]

**Table S1. Rat and Mouse piRNA Clusters.**

| Cluster(s) | Coordinates of cluster(s)* | Length of cluster(s) | Genomic context of cluster(s) | Evolution of cluster(s)             | Number of rat paralogs | Number of mouse paralogs | Paralogous cluster(s)             | Rearrangements occurring after acquisition of cluster(s)     |
|------------|----------------------------|----------------------|-------------------------------|-------------------------------------|------------------------|--------------------------|-----------------------------------|--------------------------------------------------------------|
| Rat 38     | chr9:105120000-105160000   | 40001                | Intergenic                    | Acquired after rat-mouse divergence | >2                     | >2                       | Rat 28 / Mouse 16, Rat 37, Rat 74 | Chromosomal rearrangements                                   |
| Rat 99     | chr17:20354000-20367000    | 13001                | Intergenic                    | Acquired after rat-mouse divergence | 0                      | 0                        |                                   | Inversion of cluster region                                  |
| Rat 39     | chr1:47839000-47873000     | 34001                | Intergenic                    | Acquired after rat-mouse divergence | >2                     | >2                       | Rat 49, Rat 56, Rat 86            | Inversion of rodent-specific predicted gene flanking cluster |
| Rat 56     | chr1:47729000-47753000     | 24001                | Intergenic                    | Acquired after rat-mouse divergence | >2                     | >2                       | Rat 39, Rat 49, Rat 86            | Inversion of rodent-specific predicted gene flanking cluster |
| Rat 65     | chr15:84157000-84160000    | 3001                 | Intergenic                    | Acquired after rat-mouse divergence | 1                      | 0                        | Rat 81                            | None                                                         |
| Mouse 84   | chr8:35860000-35873000     | 13001                | Intergenic                    | Acquired after rat-mouse divergence | 0                      | >2                       | Mouse 70                          | None                                                         |
| Mouse 35   | chr10:85297000-85334000    | 37001                | Intergenic                    | Acquired after rat-mouse divergence | >2                     | >2                       | Mouse 42, Mouse 54                | None                                                         |
| Rat 42     | chr5:25405000-             | 25001                | Intergenic                    | Acquired after                      | >2                     | >2                       | Rat 59                            | Complex                                                      |

|        | 25430000                 |       |            | rat-mouse divergence                |    |    |                                                                                                                                                            | rearrangements         |
|--------|--------------------------|-------|------------|-------------------------------------|----|----|------------------------------------------------------------------------------------------------------------------------------------------------------------|------------------------|
| Rat 52 | chr3:140578000-140591000 | 13001 | Intergenic | Acquired after rat-mouse divergence | >2 | 1  | Rat 5 / Mouse 6, Rat 21 / Mouse 46, Rat 24 / Mouse 41, Rat 32, Rat 45, Rat 53, Rat 55 / Mouse 58, Rat 72, Rat 73, Rat 85 / Mouse 68/89, Mouse 51, Mouse 63 | Complex rearrangements |
| Rat 59 | chr5:25621000-25636000   | 15001 | Intergenic | Acquired after rat-mouse divergence | >2 | >2 | Rat 42                                                                                                                                                     | Complex rearrangements |
| Rat 72 | chr3:140378000-140397000 | 19001 | Intergenic | Acquired after rat-mouse divergence | >2 | 0  | Rat 5 / Mouse 6, Rat 21 / Mouse 46, Rat 24 / Mouse 41, Rat 32, Rat 45, Rat 52, Rat 53, Rat 55 / Mouse 58, Rat 73, Rat 85 / Mouse 68/89, Mouse 51, Mouse 63 | Complex rearrangements |
| Rat 53 | chr3:140041000-140077000 | 36001 | Intergenic | Acquired after rat-mouse divergence | >2 | 0  | Rat 5 / Mouse 6, Rat 21 / Mouse 46, Rat 24 / Mouse 41, Rat 32, Rat 45, Rat 52, Rat 55 / Mouse 58, Rat 72, Rat 73, Rat 85 / Mouse 68/89, Mouse 51,          | Inversion near cluster |

|                   |                                                     |               |            |                                          |    |    |                                                                                                                                                 |                                                                                          |
|-------------------|-----------------------------------------------------|---------------|------------|------------------------------------------|----|----|-------------------------------------------------------------------------------------------------------------------------------------------------|------------------------------------------------------------------------------------------|
|                   |                                                     |               |            |                                          |    |    | Mouse 63                                                                                                                                        |                                                                                          |
| Rat 71            | chrX:124261000-124262000                            | 1001          | Intergenic | Acquired after rat-mouse divergence      | >2 | 0  | Rat 91                                                                                                                                          | Complex rearrangements                                                                   |
| Mouse 50          | chr8:91999000-92013000                              | 14001         | Intergenic | Acquired after rat-mouse divergence      | 0  | 0  |                                                                                                                                                 | Interchromosomal insertion of flanking gene and insertion of intergenic DNA near cluster |
| Mouse 34          | chr6:128190000-128224000                            | 34001         | Intergenic | Acquired after rodent-primate divergence | 1  | 1  |                                                                                                                                                 | Large insertion of intergenic DNA near cluster                                           |
| Rat 20 / Mouse 20 | chr10:92629000-92654000 / chr11:103533000-103559000 | 25001 / 26001 | Intergenic | Acquired after rodent-primate divergence | 0  | 0  |                                                                                                                                                 | Inversion of flanking gene                                                               |
| Rat 24 / Mouse 41 | chr4:119527000-119539000 / chr6:85140000-85156000   | 12001 / 16001 | Intergenic | Acquired after rodent-primate divergence | >2 | >2 | Rat 5 / Mouse 6, Rat 21 / Mouse 46, Rat 32, Rat 45, Rat 52, Rat 53, Rat 55 / Mouse 58, Rat 72, Rat 73, Rat 85 / Mouse 68/89, Mouse 51, Mouse 63 | None                                                                                     |
| Rat 32            | chr3:140968000-140994000                            | 26001         | Intergenic | Acquired after rodent-primate divergence | >2 | 0  | Rat 5 / Mouse 6, Rat 21 / Mouse 46, Rat 24 / Mouse 41, Rat 45, Rat 52,                                                                          | Complex rearrangements                                                                   |

|                      |                                                                |                  |            |                                                    |    |    |                                                                                                    |                                                               |
|----------------------|----------------------------------------------------------------|------------------|------------|----------------------------------------------------|----|----|----------------------------------------------------------------------------------------------------|---------------------------------------------------------------|
|                      |                                                                |                  |            |                                                    |    |    | Rat 53, Rat 55 /<br>Mouse 58, Rat 72,<br>Rat 73, Rat 85 /<br>Mouse 68/89,<br>Mouse 51, Mouse<br>63 |                                                               |
| Rat 35 /<br>Mouse 27 | chr4:116384000-<br>116396000 /<br>chr6:81912000-<br>81933000   | 12001 /<br>21001 | Intergenic | Acquired after<br>rodent-<br>primate<br>divergence | 0  | 0  |                                                                                                    | None                                                          |
| Rat 48 /<br>Mouse 24 | chr1:184495000-<br>184506000 /<br>chr7:121421000-<br>121461000 | 11001 /<br>40001 | Intergenic | Acquired after<br>rodent-<br>primate<br>divergence | 0  | 0  |                                                                                                    | None                                                          |
| Rat 67               | chr11:82952000-<br>82970000                                    | 18001            | Intergenic | Acquired after<br>rodent-<br>primate<br>divergence | >2 | >2 |                                                                                                    | None                                                          |
| Rat 76 /<br>Mouse 64 | chr5:143156000-<br>143164000 /<br>chr4:123278000-<br>123287000 | 8001 /<br>9001   | Intergenic | Acquired after<br>rodent-<br>primate<br>divergence | 0  | 0  |                                                                                                    | None                                                          |
| Rat 86               | chr1:51025000-<br>51039000                                     | 14001            | Intergenic | Acquired after<br>rodent-<br>primate<br>divergence | >2 | >2 | Rat 39, Rat 49, Rat<br>56                                                                          | Insertion of<br>intergenic DNA<br>on both sides of<br>cluster |
| Rat 90               | chr4:165034000-<br>165054000                                   | 20001            | Intergenic | Acquired after<br>rodent-<br>primate<br>divergence | >2 | >2 |                                                                                                    | Complex<br>rearrangements                                     |
| Mouse 63             | chr14:22077000-                                                | 36001            | Intergenic | Acquired after                                     | 1  | >2 | Rat 5 / Mouse 6,                                                                                   | Chromosomal                                                   |

|                   |                                                 |               |            |                                          |    |    |                                                                                                                                         |                                                                                                                  |
|-------------------|-------------------------------------------------|---------------|------------|------------------------------------------|----|----|-----------------------------------------------------------------------------------------------------------------------------------------|------------------------------------------------------------------------------------------------------------------|
|                   | 22113000                                        |               |            | rodent-primate divergence                |    |    | Rat 21 / Mouse 46, Rat 24 / Mouse 41, Rat 32, Rat 45, Rat 52, Rat 53, Rat 55 / Mouse 58, Rat 72, Rat 73, Rat 85 / Mouse 68/89, Mouse 51 | fission near cluster region                                                                                      |
| Mouse 48          | chr5:142790000-142801000                        | 11001         | Intergenic | Acquired after rodent-primate divergence | 0  | 0  |                                                                                                                                         | None                                                                                                             |
| Mouse 85          | chr13:24271000-24273000                         | 2001          | Intergenic | Acquired after rodent-primate divergence | 0  | 0  |                                                                                                                                         | None                                                                                                             |
| Mouse 92          | chr4:123336000-123342000                        | 6001          | Intergenic | Acquired after rodent-primate divergence | 0  | 0  |                                                                                                                                         | None                                                                                                             |
| Rat 17 / Mouse 21 | chr5:79245000-79257000 / chr4:61654000-61673000 | 12001 / 19001 | Intergenic | Acquired after rodent-primate divergence | 1  | 1  |                                                                                                                                         | Inversion of cluster region                                                                                      |
| Rat 37            | chr9:105449000-105469000                        | 20001         | Intergenic | Acquired after rodent-primate divergence | >2 | >2 | Rat 28 / Mouse 16, Rat 38, Rat 74                                                                                                       | Interchromosomal insertion of flanking genes on one side of cluster and inversion of intergenic DNA near cluster |

|                   |                                                   |               |            |                                          |    |    |                           |                                                                                                                               |
|-------------------|---------------------------------------------------|---------------|------------|------------------------------------------|----|----|---------------------------|-------------------------------------------------------------------------------------------------------------------------------|
| Rat 43            | chr17:17515000-17556000                           | 41001         | Intergenic | Acquired after rodent-primate divergence | 2  | 1  | Mouse 60                  | Interchromosomal insertion of flanking genes on one side of cluster and inversions of flanking genes on both sides of cluster |
| Rat 46 / Mouse 42 | chr7:18786000-18819000 / chr10:86113000-86163000  | 33001 / 50001 | Intergenic | Acquired after rodent-primate divergence | >2 | >2 |                           | Interchromosomal insertion and inversion of flanking genes on one side of cluster                                             |
| Rat 54            | chr1:102090000-102111000                          | 21001         | Intergenic | Acquired after rodent-primate divergence | >2 | >2 | Rat 58, Rat 61 / Mouse 45 | Interchromosomal insertion of flanking genes on one side of cluster and inversion of cluster region                           |
| Rat 58            | chr1:103000000-103019000                          | 19001         | Intergenic | Acquired after rodent-primate divergence | >2 | >2 | Rat 54, Rat 61 / Mouse 45 | Interchromosomal insertion of flanking genes on one side of cluster and insertion of intergenic DNA                           |
| Rat 61 / Mouse 45 | chr1:102827000-102845000 / chr7:49122000-49150000 | 18001 / 28001 | Intergenic | Acquired after rodent-primate divergence | >2 | >2 | Rat 54, Rat 58            | Interchromosomal insertion of flanking genes on one side of cluster and inversion of intergenic DNA                           |

|                      |                                                                        |                      |            |                                          |    |    |                                   |                                                                                                     |
|----------------------|------------------------------------------------------------------------|----------------------|------------|------------------------------------------|----|----|-----------------------------------|-----------------------------------------------------------------------------------------------------|
|                      |                                                                        |                      |            |                                          |    |    |                                   | near cluster                                                                                        |
| Rat 74               | chr9:105273000-105298000                                               | 25001                | Intergenic | Acquired after rodent-primate divergence | >2 | >2 | Rat 28 / Mouse 16, Rat 37, Rat 38 | Interchromosomal insertion of flanking genes on one side of cluster and inversion of cluster region |
| Rat 80               | chr5:79201000-79204000                                                 | 3001                 | Intergenic | Acquired after rodent-primate divergence | 0  | 0  |                                   | Inversion of cluster region                                                                         |
| Rat 93               | chr10:90649000-90661000                                                | 12001                | Intergenic | Acquired after rodent-primate divergence | 0  | 0  |                                   | Inversion of flanking gene                                                                          |
| Rat 40,57 / Mouse 91 | chr2:105696000-105728000, 105657000-105694000 / chr3:20186000-20211000 | 32001, 37001 / 25001 | Intergenic | Acquired after rodent-primate divergence | >2 | >2 |                                   | None                                                                                                |
| Mouse 54             | chr10:86171000-86183000                                                | 12001                | Intergenic | Acquired after rodent-primate divergence | >2 | >2 |                                   | Interchromosomal insertion and inversion of flanking genes on one side of cluster                   |
| Mouse 39             | chr14:17284000-17311000                                                | 27001                | Intergenic | Acquired after rodent-primate divergence | >2 | >2 | Mouse 26                          | Chromosomal rearrangements                                                                          |
| Mouse 60             | chr13:52433000-                                                        | 7001                 | Intergenic | Acquired after                           | 1  | 1  | Rat 43                            | Interchromosomal                                                                                    |

|                      |                                                                |                  |            |                                                    |    |    |                   |                                                                                                |
|----------------------|----------------------------------------------------------------|------------------|------------|----------------------------------------------------|----|----|-------------------|------------------------------------------------------------------------------------------------|
|                      | 52440000                                                       |                  |            | rodent-<br>primate<br>divergence                   |    |    |                   | insertion of<br>flanking genes on<br>one side of cluster<br>and inversion of<br>flanking genes |
| Mouse 70             | chr8:26050000-<br>26065000                                     | 15001            | Intergenic | Acquired after<br>rodent-<br>primate<br>divergence | 0  | 1  | Mouse 84          | 2 large deletions<br>at boundaries of<br>cluster in rodents                                    |
| Mouse 31             | chr2:151143000-<br>151162000                                   | 19001            | Intergenic | Acquired after<br>rodent-<br>primate<br>divergence | >2 | >2 | Mouse 36          | Inversion of<br>flanking genes on<br>one side of cluster                                       |
| Rat 23 /<br>Mouse 30 | chr3:141656000-<br>141670000 /<br>chr2:151055000-<br>151073000 | 14001 /<br>18001 | Intergenic | Acquired after<br>rodent-<br>primate<br>divergence | >2 | >2 | Rat 30 / Mouse 29 | Inversion of<br>flanking genes on<br>one side of cluster                                       |
| Rat 29               | chr11:84973000-<br>85028000                                    | 55001            | Intergenic | Acquired after<br>rodent-<br>primate<br>divergence | 0  | 0  |                   | Inversion of<br>flanking genes on<br>one side of cluster                                       |
| Rat 30 /<br>Mouse 29 | chr3:141591000-<br>141601000 /<br>chr2:150989000-<br>151008000 | 10001 /<br>19001 | Intergenic | Acquired after<br>rodent-<br>primate<br>divergence | >2 | >2 | Rat 23 / Mouse 30 | Inversion of<br>flanking genes on<br>one side of cluster                                       |
| Rat 47 /<br>Mouse 61 | chr4:120368000-<br>120385000 /<br>chr6:86062000-<br>86079000   | 17001 /<br>17001 | Intergenic | Acquired after<br>rodent-<br>primate<br>divergence | 0  | 0  |                   | Inversion of<br>flanking genes on<br>one side of cluster                                       |
| Rat 81               | chr10:36520000-<br>36523000                                    | 3001             | Intergenic | Acquired after<br>rodent-                          | 1  | 0  | Rat 65            | Inversion of<br>flanking genes on                                                              |



|          |                          |       |            |                                          |    |    |                                                                                                                                                            |                                                    |
|----------|--------------------------|-------|------------|------------------------------------------|----|----|------------------------------------------------------------------------------------------------------------------------------------------------------------|----------------------------------------------------|
|          |                          |       |            | primate divergence                       |    |    |                                                                                                                                                            | one side of cluster                                |
| Mouse 26 | chr14:40245000-40263000  | 18001 | Intergenic | Acquired after rodent-primate divergence | >2 | >2 | Mouse 39                                                                                                                                                   | Inversion of flanking genes on one side of cluster |
| Mouse 36 | chr2:150882000-150899000 | 17001 | Intergenic | Acquired after rodent-primate divergence | >2 | >2 | Mouse 31                                                                                                                                                   | Inversion of flanking genes on one side of cluster |
| Mouse 65 | chr13:49938000-49944000  | 6001  | Intergenic | Acquired after rodent-primate divergence | >2 | >2 | Mouse 86                                                                                                                                                   | Inversion of flanking genes on one side of cluster |
| Mouse 81 | chr14:40079000-40097000  | 18001 | Intergenic | Acquired after rodent-primate divergence | >2 | >2 |                                                                                                                                                            | Inversion of flanking genes on one side of cluster |
| Rat 33   | chr12:42905000-42939000  | 34001 | Intergenic | Acquired after rodent-primate divergence | >2 | 1  |                                                                                                                                                            | Inversion of cluster region                        |
| Rat 73   | chr2:105598000-105623000 | 25001 | Intergenic | Acquired after rodent-primate divergence | >2 | >2 | Rat 5 / Mouse 6, Rat 21 / Mouse 46, Rat 24 / Mouse 41, Rat 32, Rat 45, Rat 52, Rat 53, Rat 55 / Mouse 58, Rat 72, Rat 85 / Mouse 68/89, Mouse 51, Mouse 63 | Inversion of flanking genes on one side of cluster |

|                       |                                                                      |                     |            |                                          |    |    |                                                                                                               |                                                    |
|-----------------------|----------------------------------------------------------------------|---------------------|------------|------------------------------------------|----|----|---------------------------------------------------------------------------------------------------------------|----------------------------------------------------|
| Mouse 38              | chr15:83436000-83450000                                              | 14001               | Intergenic | Acquired after rodent-primate divergence | 0  | 0  | Rat 60                                                                                                        | Inversion of cluster and flanking gene             |
| Mouse 28              | chr10:66270000-66293000                                              | 23001               | Intergenic | Acquired after rodent-primate divergence | 0  | >2 |                                                                                                               | None                                               |
| Rat 60                | chr7:121600000-121604000                                             | 4001                | Intergenic | Acquired after rodent-primate divergence | 0  | 1  | Mouse 38                                                                                                      | Inversion of flanking genes on one side of cluster |
| Rat 63 / Mouse 33     | chr9:92473000-92479000 / chr1:92900000-92905000                      | 6001 / 5001         | Intergenic | Unknown                                  | 0  | 0  |                                                                                                               | None                                               |
| Mouse 67              | chr13:51154000-51161000                                              | 7001                | Intergenic | Unknown                                  | 0  | 0  |                                                                                                               | None                                               |
| Rat 49                | chrUn:42595000-42641000                                              | 46001               | Intergenic | Not analyzed                             | >2 | >2 | Rat 39, Rat 56, Rat 86                                                                                        | n/a                                                |
| 86                    | chr17:20779000-20785000                                              | 6001                | Intergenic | Not analyzed                             | >2 | >2 | Mouse 65                                                                                                      | n/a                                                |
| Rat 31                | chr17:20742000-20810000                                              | 68001               | Intergenic | Ancestral                                | 0  | 0  |                                                                                                               | Inversion of flanking genes on one side of cluster |
| Rat 85 / Mouse 68, 89 | chr17:20188000-20198000 / chr13:49820000-49833000, 49373000-49377000 | 10001 / 13001, 4001 | Intergenic | Ancestral                                | >2 | >2 | Rat 5 / Mouse 6, Rat 21 / Mouse 46, Rat 24 / Mouse 41, Rat 32, Rat 45, Rat 52, Rat 53, Rat 55 / Mouse 58, Rat | Inversion of flanking genes on one side of cluster |

|                            |                                                                                       |                            |            |           |   |   |                                                               |      |
|----------------------------|---------------------------------------------------------------------------------------|----------------------------|------------|-----------|---|---|---------------------------------------------------------------|------|
|                            |                                                                                       |                            |            |           |   |   | 72, Rat 73, Rat 85<br>/ Mouse 68/89,<br>Mouse 51, Mouse<br>63 |      |
| Rat 16 /<br>Mouse 15       | chr7:112772000-<br>112797000 /<br>chr15:74701000-<br>74752000                         | 25001 /<br>51001           | Intergenic | Ancestral | 0 | 0 |                                                               | None |
| Rat 36 /<br>Mouse 32       | chr5:75292000-<br>75303000 /<br>chr4:57398000-<br>57406000                            | 11001 /<br>8001            | Intergenic | Ancestral | 0 | 0 |                                                               | None |
| Rat 79 /<br>Mouse 66       | chr9:90835000-<br>90839000 /<br>chr1:91310000-<br>91314000                            | 4001 /<br>4001             | Intergenic | Ancestral | 0 | 0 |                                                               | None |
| Rat 97                     | chr12:11152000-<br>11160000                                                           | 8001                       | Intergenic | Ancestral | 0 | 0 |                                                               | None |
| Rat 41,51<br>/ Mouse<br>44 | chr1:13931000-<br>13959000,<br>13901000-<br>13927000 /<br>chr10:18519000-<br>18554000 | 28001,<br>26001 /<br>35001 | Intergenic | Ancestral | 0 | 0 |                                                               | None |
| Rat 68 /<br>Mouse 72       | chr13:37654000-<br>37658000 /<br>chr1:125054000-<br>125057000                         | 4001 /<br>3001             | Intergenic | Ancestral | 0 | 0 |                                                               | None |
| Rat 1 /<br>Mouse 1         | chr20:5480000-<br>5581000 /<br>chr17:25458000-                                        | 101001 /<br>95001          | Intergenic | Ancestral | 0 | 0 |                                                               | None |

|                      |                                                                |                  |            |           |   |   |                                                                                                                                                                           |              |
|----------------------|----------------------------------------------------------------|------------------|------------|-----------|---|---|---------------------------------------------------------------------------------------------------------------------------------------------------------------------------|--------------|
|                      | 25553000                                                       |                  |            |           |   |   |                                                                                                                                                                           |              |
| Rat 2 /<br>Mouse 5   | chr4:164469000-<br>164546000 /<br>chr6:127799000-<br>127879000 | 77001 /<br>80001 | Intergenic | Ancestral | 0 | 0 |                                                                                                                                                                           | None         |
| Rat 5 /<br>Mouse 6   | chr1:129070000-<br>129164000 /<br>chr7:69622000-<br>69701000   | 94001 /<br>79001 | Intergenic | Ancestral | 0 | 0 | Rat 21 / Mouse 46,<br>Rat 24 / Mouse 41,<br>Rat 32, Rat 45, Rat<br>52, Rat 53, Rat 55<br>/ Mouse 58, Rat<br>72, Rat 73, Rat 85<br>/ Mouse 68/89,<br>Mouse 51, Mouse<br>63 | None         |
| Rat 6 /<br>Mouse 13  | chr8:57725000-<br>57777000 /<br>chr9:54236000-<br>54298000     | 52001 /<br>62001 | Intergenic | Ancestral | 0 | 0 |                                                                                                                                                                           | None         |
| Rat 7 /<br>Mouse 2   | chr8:72069000-<br>72129000 /<br>chr9:67715000-<br>67803000     | 60001 /<br>88001 | Intergenic | Ancestral | 0 | 0 |                                                                                                                                                                           | None         |
| Rat 8                | chr12:5597000-<br>5633000                                      | 36001            | Intergenic | Ancestral | 0 | 0 |                                                                                                                                                                           | None         |
| Rat 9 /<br>Mouse 14  | chr7:68946000-<br>69002000                                     | 60001 /<br>56001 | Intergenic | Ancestral | 0 | 0 |                                                                                                                                                                           | None         |
| Rat 10 /<br>Mouse 17 | chr5:114521000-<br>114575000 /<br>chr4:93669000-<br>93725000   | 54001 /<br>56001 | Intergenic | Ancestral | 0 | 0 |                                                                                                                                                                           | None         |
| Rat 12 /             | chr7:96057000-                                                 | 59001 /          | Intergenic | Ancestral | 0 | 0 |                                                                                                                                                                           | Inversion of |

|                      |                                                                |                  |            |           |    |    |                                                                                                                                                                        |                                |
|----------------------|----------------------------------------------------------------|------------------|------------|-----------|----|----|------------------------------------------------------------------------------------------------------------------------------------------------------------------------|--------------------------------|
| Mouse 9              | 96116000 /<br>chr15:59313000-<br>59370000                      | 57001            |            |           |    |    |                                                                                                                                                                        | flanking gene                  |
| Rat 18               | chr15:218000-<br>262000                                        | 44001            | Intergenic | Ancestral | 0  | 1  | Mouse 12                                                                                                                                                               | None                           |
| Rat 19 /<br>Mouse 37 | chr19:40002000-<br>40017000 /<br>chr8:108718000-<br>108731000  | 15001 /<br>13001 | Intergenic | Ancestral | 0  | 0  |                                                                                                                                                                        | None                           |
| Rat 25               | chr19:15907000-<br>15945000                                    | 38001            | Intergenic | Ancestral | 0  | 0  | Mouse 25                                                                                                                                                               | None                           |
| Rat 28 /<br>Mouse 16 | chr9:105522000-<br>105551000 /<br>chr17:64393000-<br>64458000  | 29001 /<br>65001 | Intergenic | Ancestral | >2 | >2 | Rat 37, Rat 38, Rat<br>74                                                                                                                                              | Inversion of<br>cluster region |
| Rat 34 /<br>Mouse 43 | chr5:154408000-<br>154412000 /<br>chr4:134996000-<br>135009000 | 4001 /<br>13001  | Intergenic | Ancestral | 0  | 0  |                                                                                                                                                                        | None                           |
| Rat 44 /<br>Mouse 75 | chr12:20765000-<br>20783000 /<br>chr5:135888000-<br>135908000  | 18001 /<br>20001 | Intergenic | Ancestral | 0  | 0  |                                                                                                                                                                        | None                           |
| Rat 45               | chr4:119575000-<br>119601000                                   | 26001            | Intergenic | Ancestral | >2 | >2 | Rat 5 / Mouse 6,<br>Rat 21 / Mouse 46,<br>Rat 24 / Mouse 41,<br>Rat 32, Rat 52, Rat<br>53, Rat 55 / Mouse<br>58, Rat 72, Rat 73,<br>Rat 85 / Mouse<br>68/89, Mouse 51, | None                           |

|                      |                                                               |                  |            |           |    |   |          |      |
|----------------------|---------------------------------------------------------------|------------------|------------|-----------|----|---|----------|------|
|                      |                                                               |                  |            |           |    |   | Mouse 63 |      |
| Rat 50 /<br>Mouse 59 | chr1:241697000-<br>241724000 /<br>chr19:36956000-<br>36962000 | 27001 /<br>6001  | Intergenic | Ancestral | 0  | 0 |          | None |
| Rat 62               | chr14:41998000-<br>42011000                                   | 13001            | Intergenic | Ancestral | 0  | 0 |          | None |
| Rat 64               | chr9:7094000-<br>7096000                                      | 2001             | Intergenic | Ancestral | 0  | 0 |          | None |
| Rat 69               | chr17:18976000-<br>19001000                                   | 25001            | Intergenic | Ancestral | 0  | 0 |          | None |
| Rat 84               | chr6:93598000-<br>93616000                                    | 18001            | Intergenic | Ancestral | 0  | 0 |          | None |
| Rat 87 /<br>Mouse 77 | chr7:31878000-<br>31887000 /<br>chr10:94234000-<br>94238000   | 9001 /<br>4001   | Intergenic | Ancestral | 0  | 0 |          | None |
| Rat 91               | chrX:123931000-<br>123946000                                  | 15001            | Intergenic | Ancestral | >2 | 0 | Rat 71   | None |
| Rat 92 /<br>Mouse 79 | chrX:152895000-<br>152918000 /<br>chrX:62174000-<br>62206000  | 23001 /<br>32001 | Intergenic | Ancestral | 0  | 0 |          | None |
| Rat 94               | chr2:44320000-<br>44347000                                    | 27001            | Intergenic | Ancestral | 0  | 0 |          | None |
| Rat 95 /<br>Mouse 47 | chr2:121139000-<br>121146000 /<br>chr3:34676000-<br>34687000  | 7001 /<br>11001  | Intergenic | Ancestral | 0  | 0 |          | None |
| Mouse 25             | chr8:90782000-                                                | 13001            | Intergenic | Ancestral | 1  | 0 | Rat 25   | None |

|                      |                                                        |                  |                     |           |   |   |  |                                                                    |
|----------------------|--------------------------------------------------------|------------------|---------------------|-----------|---|---|--|--------------------------------------------------------------------|
|                      | 90795000                                               |                  |                     |           |   |   |  |                                                                    |
| Mouse 82             | chr1:57602000-57611000                                 | 9001             | Intergenic          | Ancestral | 0 | 0 |  | None                                                               |
| Mouse 90             | chr13:20869000-20871000                                | 2001             | Intergenic          | Ancestral | 0 | 0 |  | None                                                               |
| Mouse 93             | chr10:84029000-84037000                                | 8001             | Intergenic          | Ancestral | 0 | 0 |  | None                                                               |
| Mouse 7              | chr5:112507000-112564000                               | 57001            | Intergenic          | Ancestral | 0 | 0 |  | Interchromosomal movement of flanking genes on one side of cluster |
| Mouse 62             | chr17:47253000-47256000                                | 3001             | Intergenic          | Ancestral | 0 | 0 |  | None                                                               |
| Rat 11 /<br>Mouse 11 | chr1:124891000-124959000 /<br>chr7:65734000-65810000   | 68001 /<br>76001 | Intergenic          | Ancestral | 0 | 0 |  | None                                                               |
| Rat 89               | chr20:22761000-22765000                                | 4001             | Intergenic          | Ancestral | 0 | 0 |  | None                                                               |
| Mouse 87             | chr8:115820000-115829000                               | 9001             | Intergenic          | Ancestral | 0 | 0 |  | None                                                               |
| Rat 66 /<br>Mouse 55 | chr4:165701000-165712000 /<br>chr6:128462000-128474000 | 11001 /<br>12001 | Overlapping gene(s) | Ancestral | 0 | 0 |  | Inversion of flanking genes on one side of cluster                 |
| Rat 3 /<br>Mouse 4   | chr3:76817000-76892000 /<br>chr2:92374000-92462000     | 75001 /<br>88001 | Overlapping gene(s) | Ancestral | 0 | 0 |  | None                                                               |
| Rat 4 /              | chr6:122540000-                                        | 84001 /          | Overlapping         | Ancestral | 0 | 0 |  | None                                                               |

|                      |                                                                |                  |                        |           |   |   |                                                                                                                                                                         |                                                          |
|----------------------|----------------------------------------------------------------|------------------|------------------------|-----------|---|---|-------------------------------------------------------------------------------------------------------------------------------------------------------------------------|----------------------------------------------------------|
| Mouse 8              | 122624000 /<br>chr12:95876000-<br>95950000                     | 74001            | gene(s)                |           |   |   |                                                                                                                                                                         |                                                          |
| Rat 13 /<br>Mouse 18 | chr12:44134000-<br>44189000 /<br>chr5:114033000-<br>114076000  | 55001 /<br>43001 | Overlapping<br>gene(s) | Ancestral | 0 | 0 |                                                                                                                                                                         | Inversion of<br>flanking genes on<br>one side of cluster |
| Rat 14 /<br>Mouse 3  | chr18:63622000-<br>63658000 /<br>chr18:67419000-<br>67485000   | 36001 /<br>66001 | Overlapping<br>gene(s) | Ancestral | 0 | 0 |                                                                                                                                                                         | Multiple<br>inversions of<br>flanking genes              |
| Rat 15               | chr20:13186000-<br>13223000                                    | 37001            | Overlapping<br>gene(s) | Ancestral | 0 | 1 | Mouse 19                                                                                                                                                                | Inversion of<br>flanking genes on<br>one side of cluster |
| Rat 21 /<br>Mouse 46 | chr3:115118000-<br>115142000 /<br>chr2:127432000-<br>127445000 | 24001 /<br>13001 | Overlapping<br>gene(s) | Ancestral | 1 | 1 | Rat 5 / Mouse 6,<br>Rat 24 / Mouse 41,<br>Rat 32, Rat 45, Rat<br>52, Rat 53, Rat 55<br>/ Mouse 58, Rat<br>72, Rat 73, Rat 85<br>/ Mouse 68/89,<br>Mouse 51, Mouse<br>63 | Inversion of<br>flanking genes on<br>one side of cluster |
| Rat 22 /<br>Mouse 40 | chr4:122403000-<br>122440000 /<br>chr6:88042000-<br>88069000   | 37001 /<br>27001 | Overlapping<br>gene(s) | Ancestral | 0 | 0 |                                                                                                                                                                         | Inversion of<br>flanking genes on<br>one side of cluster |
| Rat 26 /<br>Mouse 23 | chr20:29911000-<br>29965000 /<br>chr10:62171000-<br>62224000   | 54001 /<br>53001 | Overlapping<br>gene(s) | Ancestral | 0 | 0 |                                                                                                                                                                         | None                                                     |



|                      |                                                                |                  |                        |           |   |   |                                                                                                                                                                         |      |
|----------------------|----------------------------------------------------------------|------------------|------------------------|-----------|---|---|-------------------------------------------------------------------------------------------------------------------------------------------------------------------------|------|
| Rat 27 /<br>Mouse 22 | chr7:116628000-<br>116678000 /<br>chr15:78725000-<br>78767000  | 50001 /<br>42001 | Overlapping<br>gene(s) | Ancestral | 0 | 0 |                                                                                                                                                                         | None |
| Rat 55 /<br>Mouse 58 | chr2:221181000-<br>221209000 /<br>chr3:124237000-<br>124263000 | 28001 /<br>26001 | Overlapping<br>gene(s) | Ancestral | 1 | 1 | Rat 5 / Mouse 6,<br>Rat 21 / Mouse 46,<br>Rat 24 / Mouse 41,<br>Rat 32, Rat 45, Rat<br>52, Rat 53, Rat 72,<br>Rat 73, Rat 85 /<br>Mouse 68/89,<br>Mouse 51, Mouse<br>63 | None |
| Rat 70               | chr13:73630000-<br>73667000                                    | 37001            | Overlapping<br>gene(s) | Ancestral | 0 | 0 |                                                                                                                                                                         | None |
| Rat 75               | chrUn:15394000-<br>15406000                                    | 12001            | Overlapping<br>gene(s) | Ancestral | 0 | 0 |                                                                                                                                                                         | None |
| Rat 77               | chr12:27425000-<br>27443000                                    | 18001            | Overlapping<br>gene(s) | Ancestral | 0 | 1 | Mouse 80                                                                                                                                                                | None |
| Rat 78               | chr7:94716000-<br>94745000                                     | 29001            | Overlapping<br>gene(s) | Ancestral | 0 | 0 |                                                                                                                                                                         | None |
| Rat 82               | chr1:92677000-<br>92707000                                     | 30001            | Overlapping<br>gene(s) | Ancestral | 0 | 0 |                                                                                                                                                                         | None |
| Rat 83 /<br>Mouse 71 | chr9:90967000-<br>90984000 /<br>chr1:91445000-<br>91467000     | 17001 /<br>22001 | Overlapping<br>gene(s) | Ancestral | 0 | 0 |                                                                                                                                                                         | None |
| Rat 88 /<br>Mouse 49 | chr8:47138000-<br>47143000 /<br>chr9:44078000-<br>44086000     | 5001 /<br>8001   | Overlapping<br>gene(s) | Ancestral | 0 | 0 |                                                                                                                                                                         | None |

|                    |                                                   |             |                     |           |   |   |                                                                                                                                                          |                                                                    |
|--------------------|---------------------------------------------------|-------------|---------------------|-----------|---|---|----------------------------------------------------------------------------------------------------------------------------------------------------------|--------------------------------------------------------------------|
| Rat 96             | chr15:187000-217000                               | 30001       | Overlapping gene(s) | Ancestral | 0 | 0 |                                                                                                                                                          | None                                                               |
| Rat 98             | chr5:63093000-63106000                            | 13001       | Overlapping gene(s) | Ancestral | 0 | 0 |                                                                                                                                                          | None                                                               |
| Rat 100 / Mouse 94 | chr10:84482000-84488000 / chr11:95874000-95880000 | 6001 / 6001 | Overlapping gene(s) | Ancestral | 0 | 0 |                                                                                                                                                          | Interchromosomal movement of flanking gene                         |
| Mouse10            | chr5:148721000-148766000                          | 45001       | Overlapping gene(s) | Ancestral | 0 | 0 |                                                                                                                                                          | None                                                               |
| Mouse 12           | chr14:21743000-21796000                           | 53001       | Overlapping gene(s) | Ancestral | 1 | 0 | Rat 18                                                                                                                                                   | Interchromosomal movement of flanking genes on one side of cluster |
| Mouse 19           | chr10:75491000-75537000                           | 46001       | Overlapping gene(s) | Ancestral | 1 | 0 | Rat 15                                                                                                                                                   | None                                                               |
| Mouse 51           | chr14:22009000-22038000                           | 29001       | Overlapping gene(s) | Ancestral | 1 | 1 | Rat 5 / Mouse 6, Rat 21 / Mouse 46, Rat 24 / Mouse 41, Rat 32, Rat 45, Rat 52, Rat 53, Rat 55 / Mouse 58, Rat 72, Rat 73, Rat 85 / Mouse 68/89, Mouse 63 | None                                                               |
| Mouse 52           | chr10:127189000-127202000                         | 13001       | Overlapping gene(s) | Ancestral | 0 | 0 |                                                                                                                                                          | None                                                               |
| Mouse 53           | chr7:27076000-27084000                            | 8001        | Overlapping gene(s) | Ancestral | 0 | 0 |                                                                                                                                                          | None                                                               |
| Mouse 56           | chr11:108102000-                                  | 5001        | Overlapping         | Ancestral | 0 | 0 |                                                                                                                                                          | Large insertion                                                    |

|          | 108107000                |       | gene(s)             |           |   |   |        | into intron of overlapping gene |
|----------|--------------------------|-------|---------------------|-----------|---|---|--------|---------------------------------|
| Mouse 57 | chr5:134131000-134139000 | 8001  | Overlapping gene(s) | Ancestral | 0 | 0 |        | None                            |
| Mouse 69 | chr9:51827000-51831000   | 4001  | Overlapping gene(s) | Ancestral | 0 | 0 |        | None                            |
| Mouse 73 | chr15:73176000-73188000  | 12001 | Overlapping gene(s) | Ancestral | 0 | 0 |        | None                            |
| Mouse 74 | chr5:101021000-101040000 | 19001 | Overlapping gene(s) | Ancestral | 0 | 0 |        | None                            |
| Mouse 76 | chr15:80000000-80039000  | 39001 | Overlapping gene(s) | Ancestral | 0 | 0 |        | None                            |
| Mouse 78 | chr8:109603000-109621000 | 18001 | Overlapping gene(s) | Ancestral | 0 | 0 |        | None                            |
| Mouse 80 | chr5:129378000-129393000 | 15001 | Overlapping gene(s) | Ancestral | 1 | 0 | Rat 77 | None                            |
| Mouse 83 | chr10:60946000-60952000  | 6001  | Overlapping gene(s) | Ancestral | 0 | 0 |        | None                            |
| Mouse 88 | chr6:92248000-92270000   | 22001 | Overlapping gene(s) | Ancestral | 0 | 0 |        | None                            |

\*All coordinates are given according to the UCSC Genome Browser (mouse build mm7, rat build rn3).
